# Supplementary material
Source: PubMed Central journal article supplement (PMC6037913)
Supplement: NIHMS966988-supplement-Supplementary_material.pdf [file NIHMS966988-supplement-Supplementary_material.pdf]

In the format provided by the authors and unedited.

# Electrophilic properties of itaconate and derivatives regulate the $\text{I}\kappa\text{B}\zeta$ –ATF3 inflammatory axis

Monika Bambouskova<sup>1</sup>, Laurent Gorvel<sup>1</sup>, Vicky Lampropoulou<sup>1</sup>, Alexey Sergushichev<sup>2</sup>, Ekaterina Loginicheva<sup>1</sup>, Kendall Johnson<sup>3</sup>, Daniel Korenfeld<sup>1</sup>, Mary Elizabeth Mathyer<sup>4</sup>, Hyeryun Kim<sup>3</sup>, Li-Hao Huang<sup>1</sup>, Dustin Duncan<sup>5</sup>, Howard Bregman<sup>3</sup>, Abdurrahman Keskin<sup>6</sup>, Andrea Santeford<sup>7</sup>, Rajendra S. Apte<sup>7</sup>, Raghav Sehgal<sup>8</sup>, Britney Johnson<sup>1</sup>, Gaya K. Amarasinghe<sup>1</sup>, Miguel P. Soares<sup>9</sup>, Takashi Satoh<sup>10</sup>, Shizuo Akira<sup>10</sup>, Tsonwin Hai<sup>11</sup>, Cristina de Guzman Strong<sup>4</sup>, Karine Auclair<sup>5</sup>, Thomas P. Roddy<sup>3</sup>, Scott A. Biller<sup>3</sup>, Marko Jovanovic<sup>6</sup>, Eynav Klechevsky<sup>1</sup>, Kelly M. Stewart<sup>3</sup>, Gwendalyn J. Randolph<sup>1</sup> & Maxim N. Artyomov<sup>1\*</sup>

<sup>1</sup>Department of Pathology and Immunology, Washington University School of Medicine, St. Louis, MO, USA. <sup>2</sup>Computer Technologies Department, ITMO University, Saint Petersburg, Russia.

<sup>3</sup>Agius Pharmaceuticals, Cambridge, MA, USA. <sup>4</sup>Division of Dermatology, Center for Pharmacogenomics, Center for the Study of Itch, Department of Medicine, Washington University School of Medicine, St. Louis, MO, USA. <sup>5</sup>Department of Chemistry, McGill University, Montreal, Quebec, Canada. <sup>6</sup>Department of Biological Sciences, Columbia University, New York, NY, USA. <sup>7</sup>Department of Ophthalmology and Visual Sciences, Washington University School of Medicine, St. Louis, MO, USA. <sup>8</sup>Elucidata Corporation, Cambridge, MA, USA. <sup>9</sup>Instituto Gulbenkian de Ciência, Oeiras, Portugal.

<sup>10</sup>Host Defense, Immunology Frontier Research Center, Osaka University, Suita, Japan. <sup>11</sup>Department of Biological Chemistry and Pharmacology, Ohio State University, Columbus, OH, USA.

\*e-mail: [martyomov@wustl.edu](mailto:martyomov@wustl.edu)

Supplementary Figure 1. Western blot source data with size marker indications.

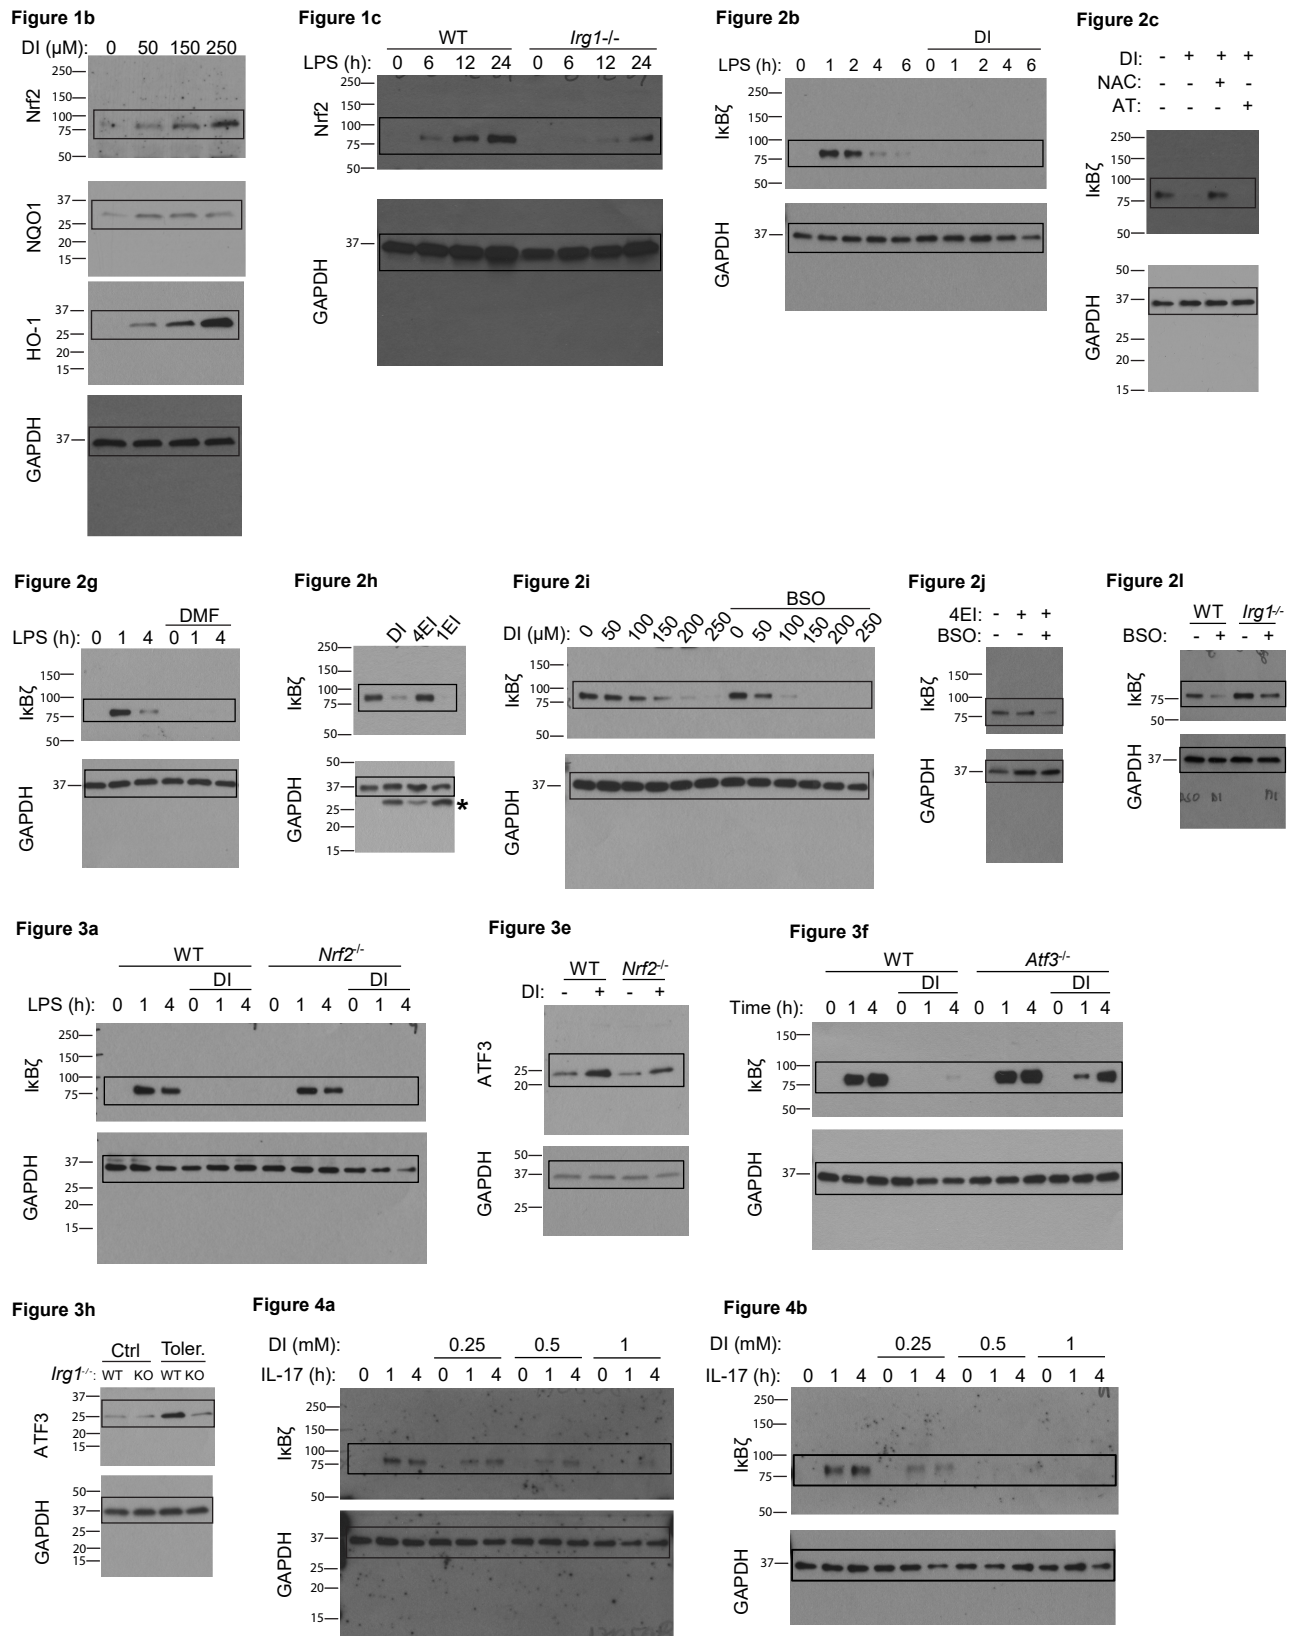

All data are uncropped and unprocessed scans of original films.

\*Asterisk indicates signal reminiscent from previous staining of the membrane with different antibody

Ext. Data Fig. 1j

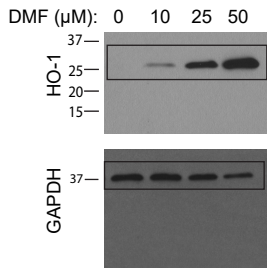

Ext. Data Fig. 2a

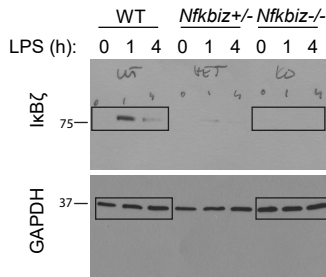

Ext. Data Fig. 2e

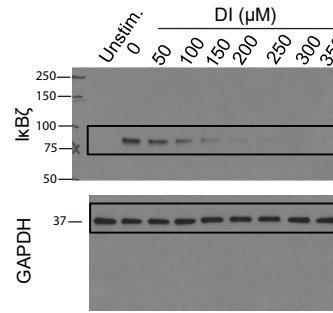

Ext. Data Fig. 2g

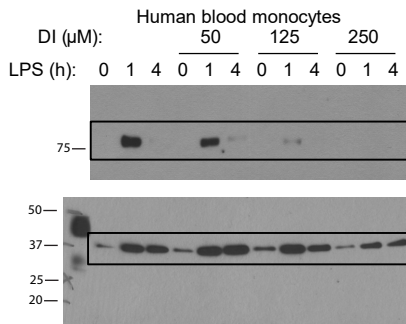

Ext. Data Fig. 2h

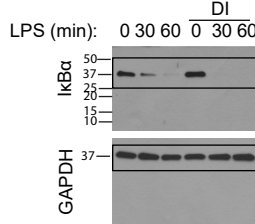

Ext. Data Fig. 2i

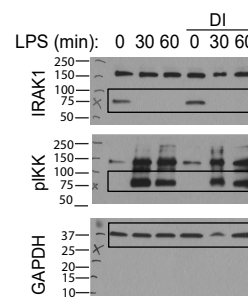

Ext. Data Fig. 2k

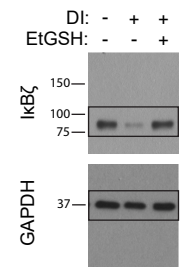

Ext. Data Fig. 2l

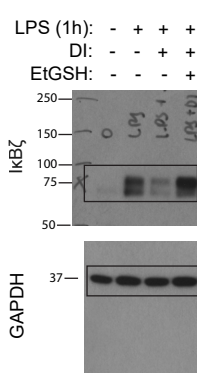

Ext. Data Fig. 3b

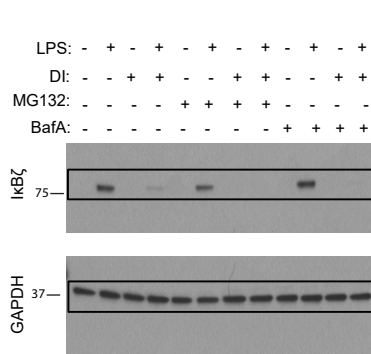

Ext. Data Fig. 3d

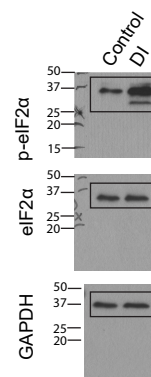

Ext. Data Fig. 3e

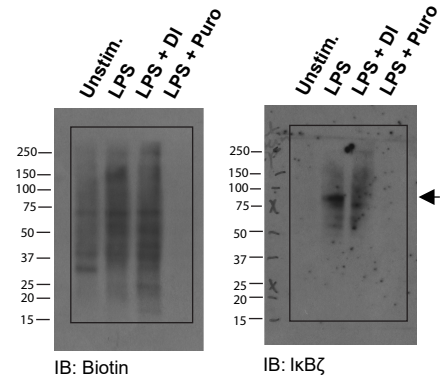

Ext. Data Fig. 4a

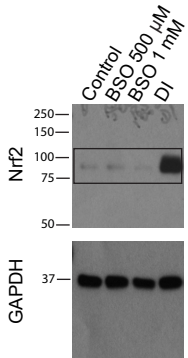

Ext. Data Fig. 4f

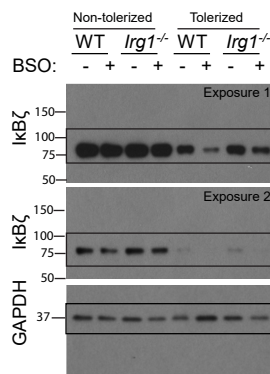

Ext. Data Fig. 5a

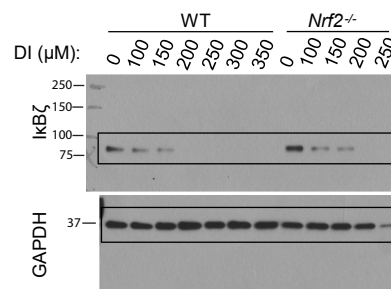

Ext. Data Fig. 5b

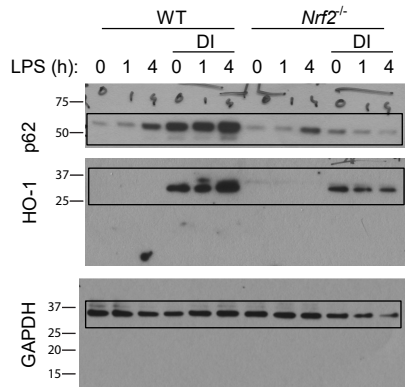

Ext. Data Fig. 5c

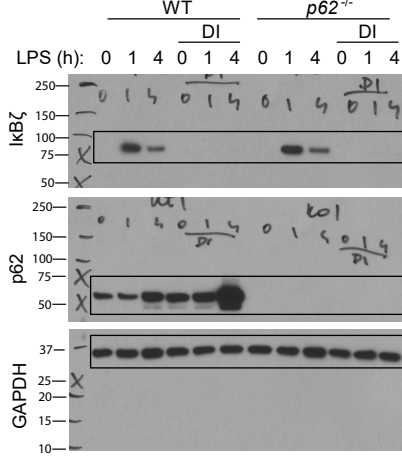

Ext. Data Fig. 5d

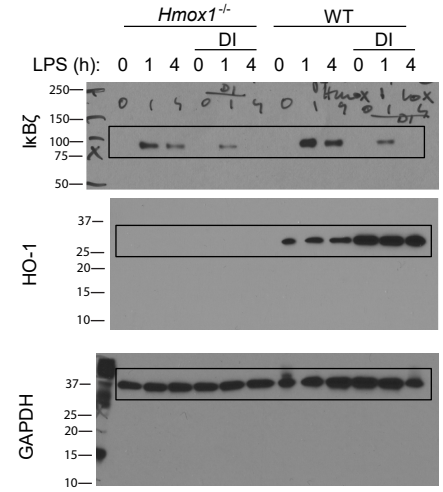

Ext. Data Fig. 5g

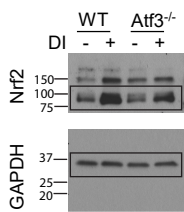

Ext. Data Fig. 5h

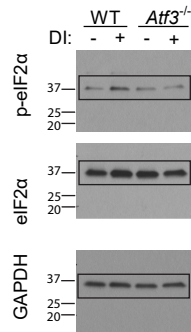

Ext. Data Fig. 5i

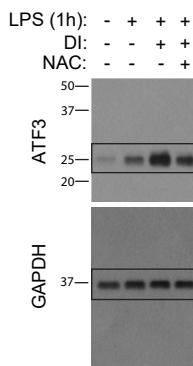

Ext. Data Fig. 5j

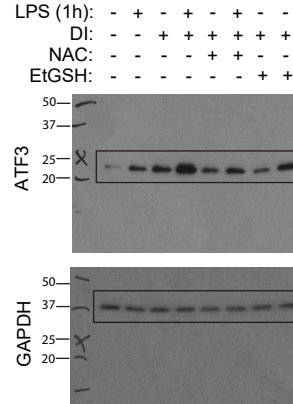

Ext. Data Fig. 5k

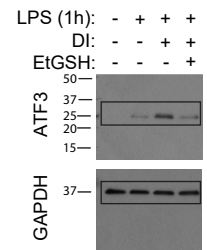

Ext. Data Fig. 7c

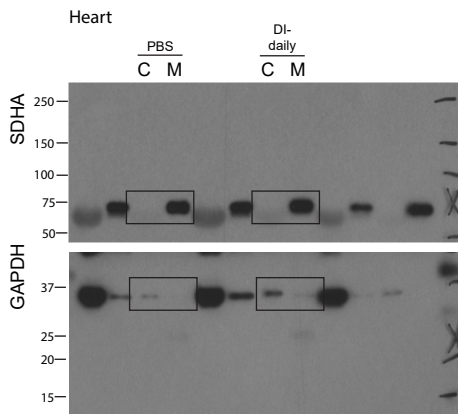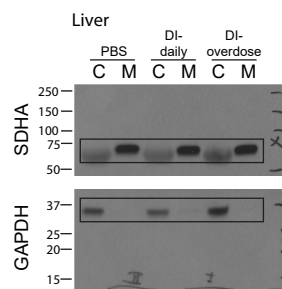



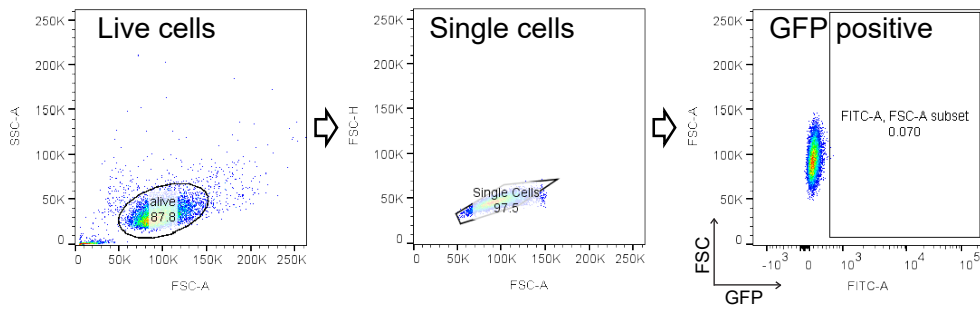

Supplementary Figure 2. Flow cytometry gating. Dead cells and debris were gated out based on FSC and SSC. Next, single cells were gated based on FSC. Final dot plots indicate FCS versus GFP signal. GFP negative cells (non-transduced BV2 as shown) were used to set the gate for GFP positive cells.
